# Supplementary figures and images for: Broad-Spectrum HDAC Inhibitors Promote Autophagy through FOXO Transcription Factors in Neuroblastoma
Source: MDPI journal article supplement (doi:10.3390/cells10051001), 2021-04-24

**a**

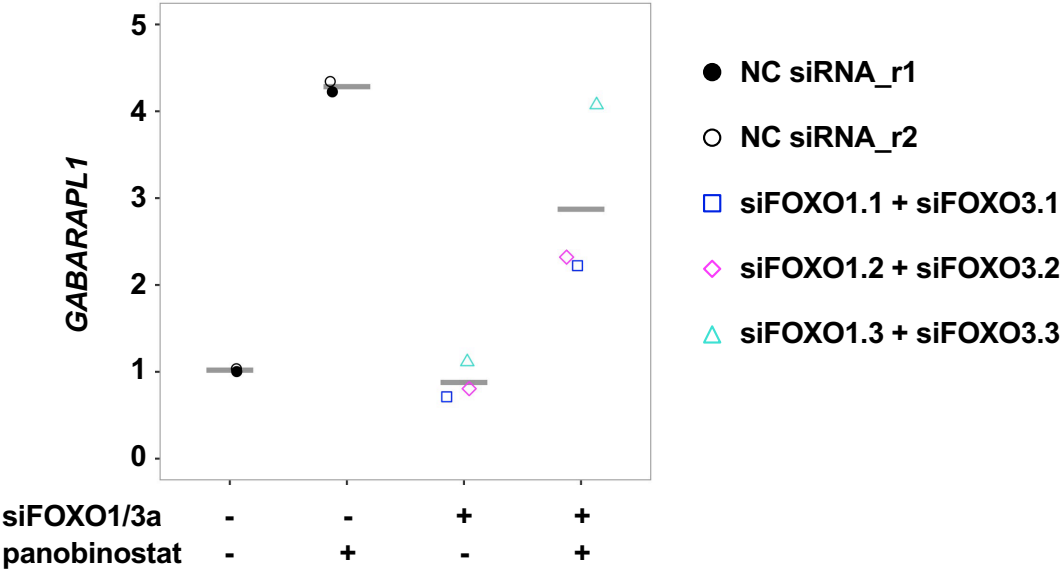

**b**

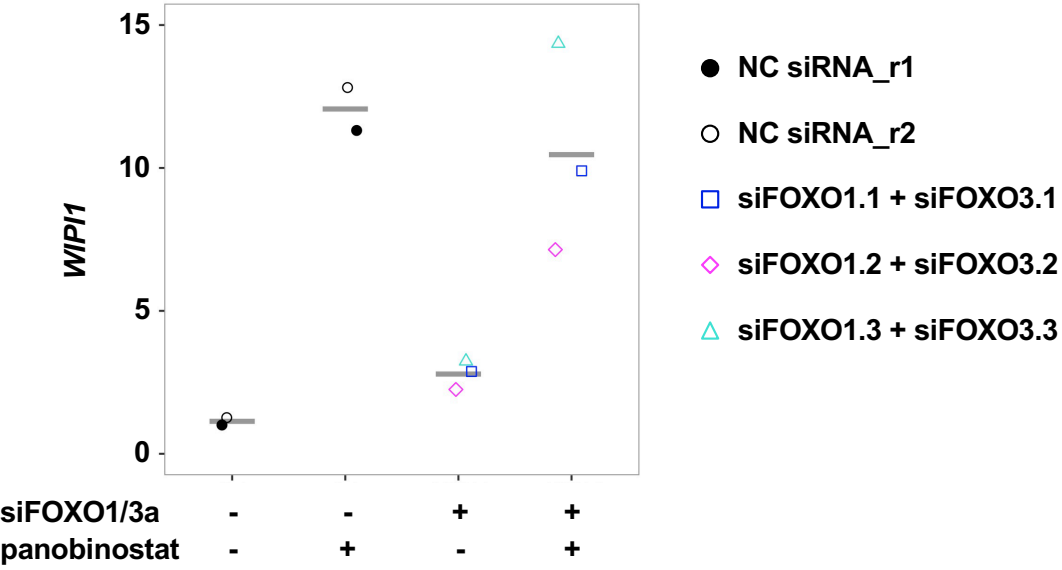

Supplement: s1 [file s1]

**a**

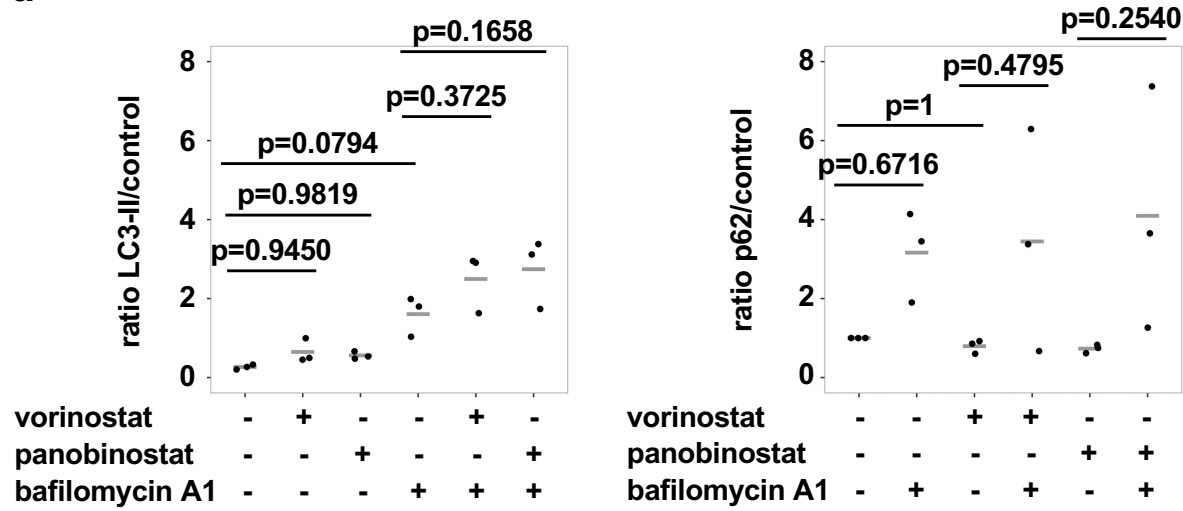

Supplemental Fig. 1

**b**

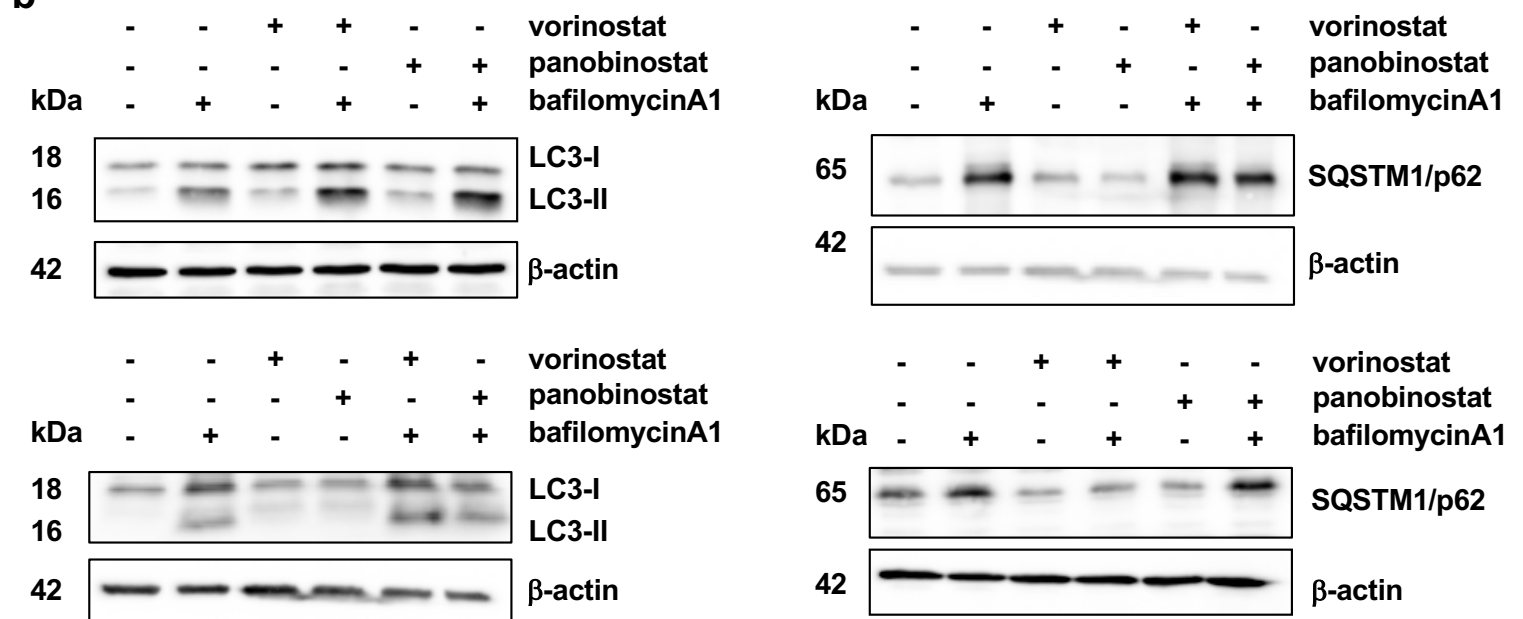

**c**

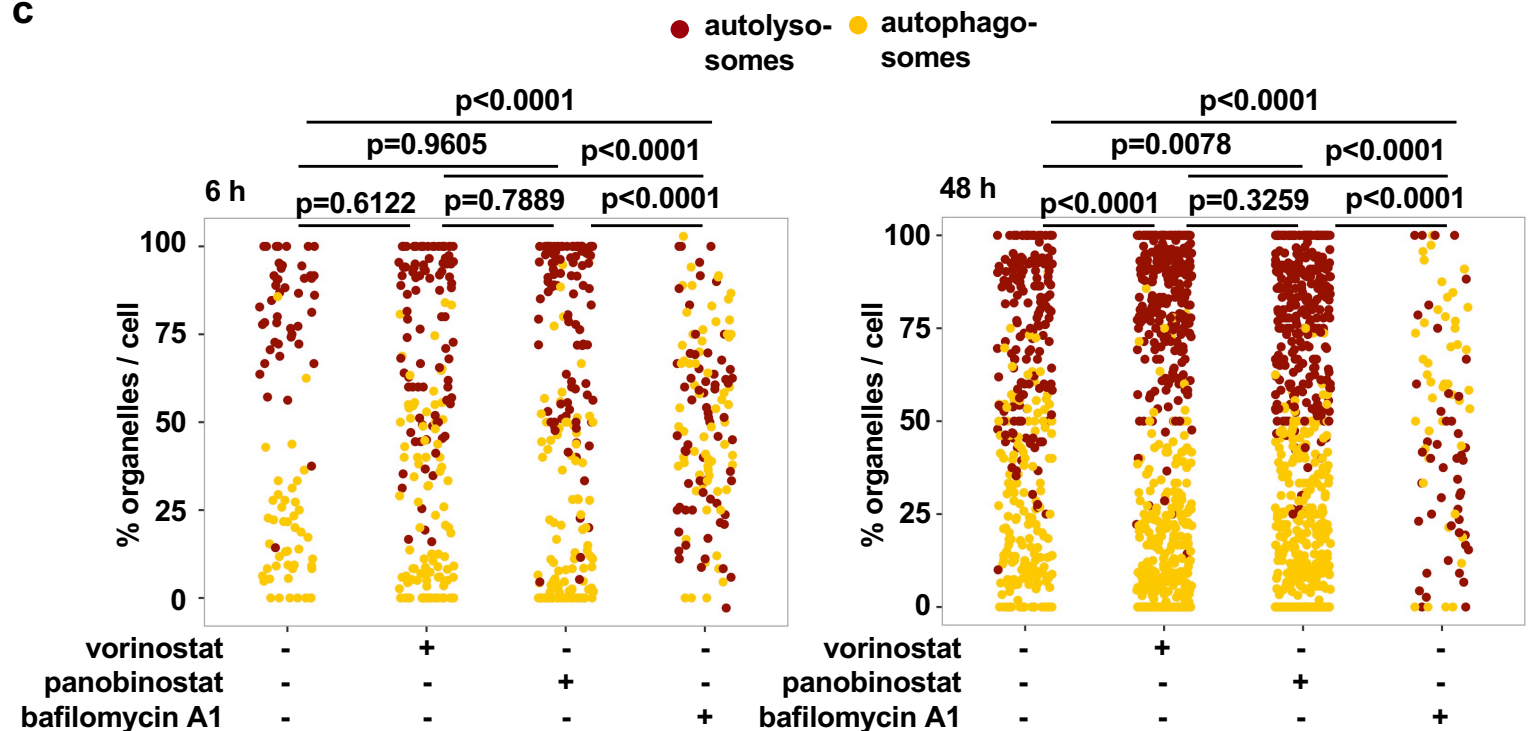

Supplement: s1 [file s1]

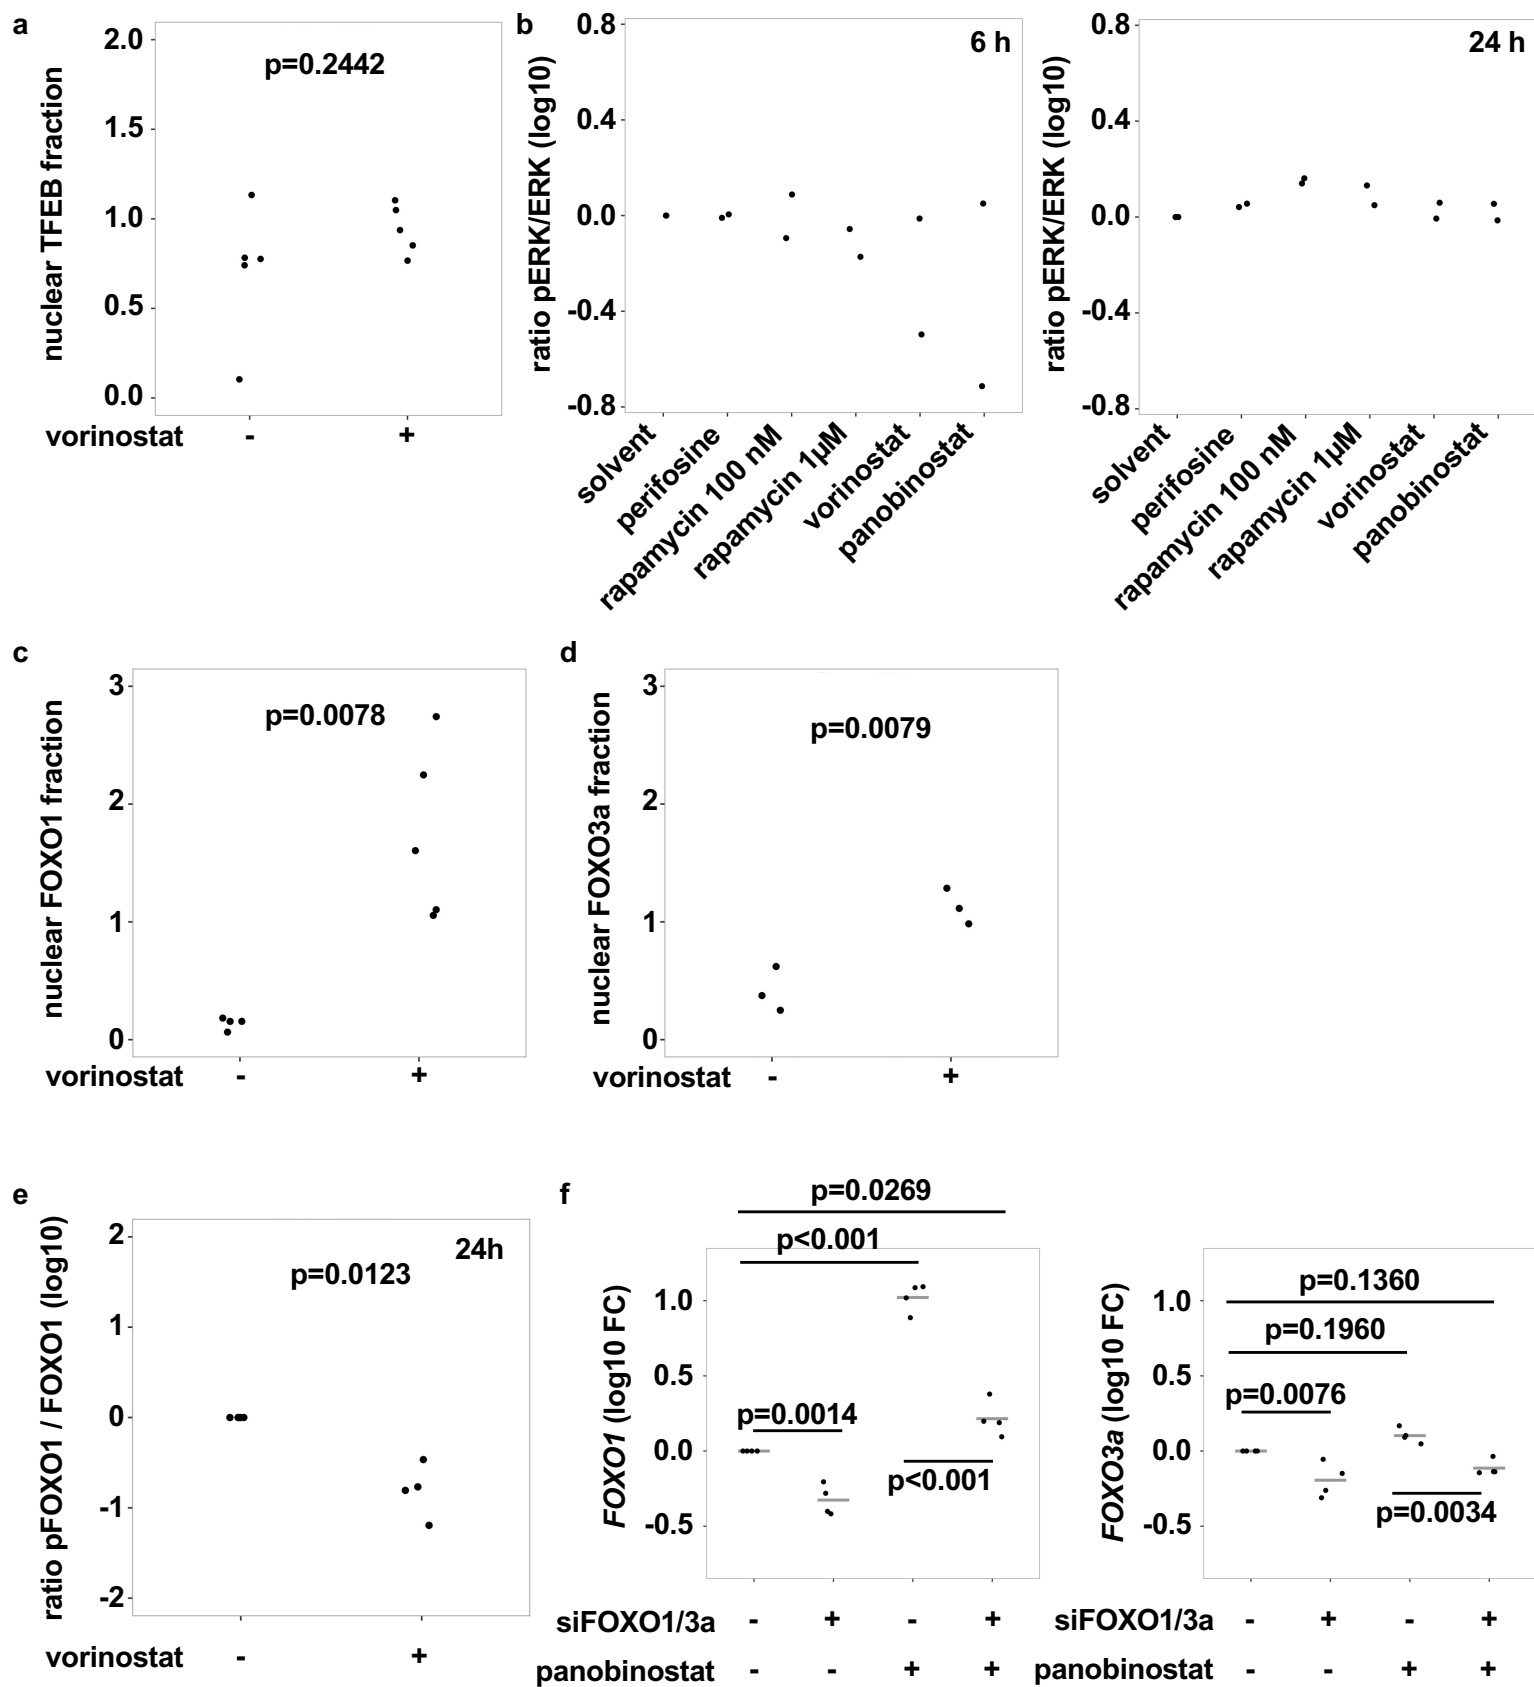

Supplement: s1 [file s1]

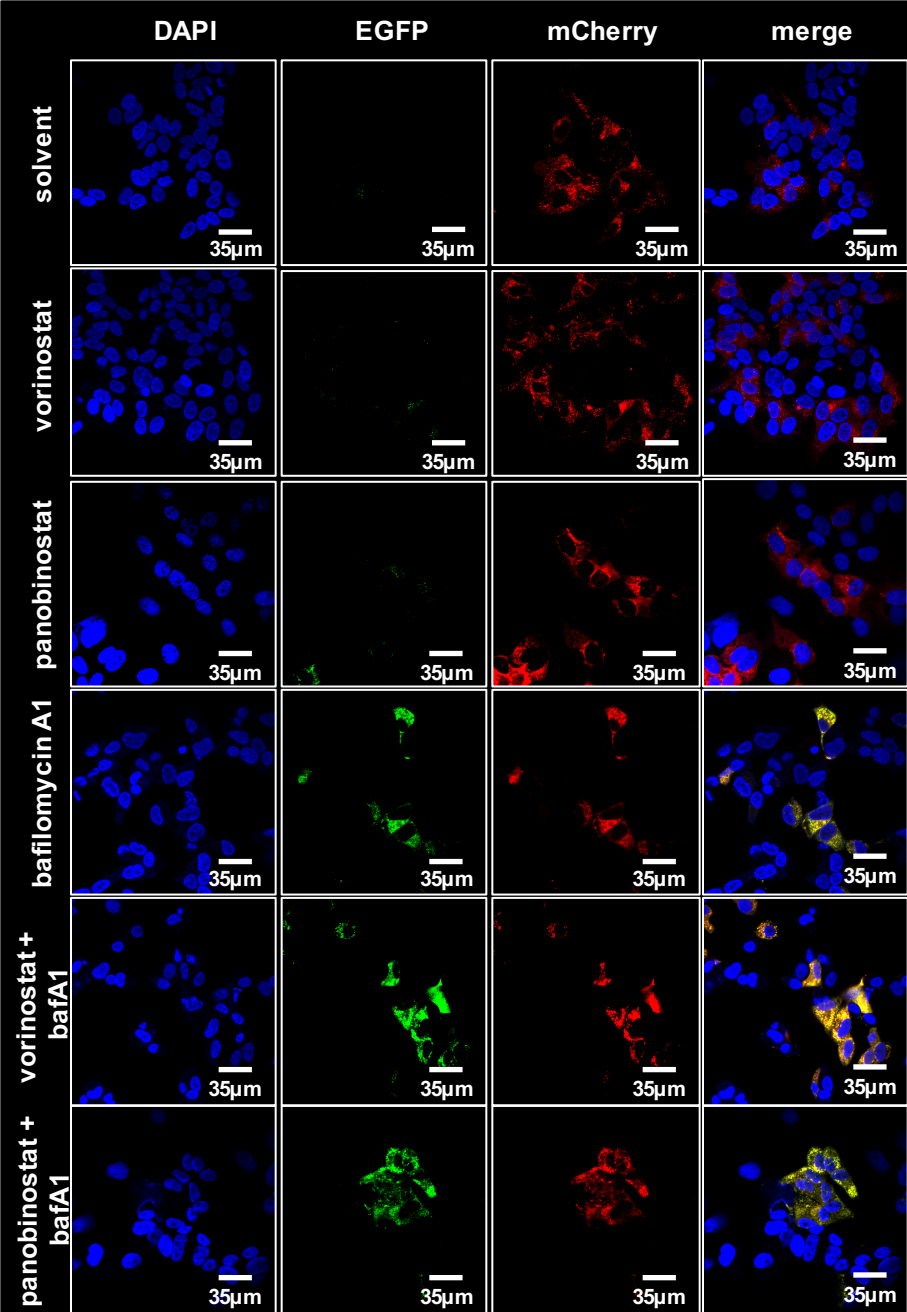

Supplement: s1 [file s1]
